# Supplementary material for: Development of optical and electrochemical immunodevices for dengue virus detection
Source: Royal Society of Chemistry journal article supplement (doi:10.1039/d4ay00514g), 2024-01-01
Supplement: d4ay00514g1.pdf [file d4ay00514g1.pdf]

Electronic Supporting Material

**DEVELOPMENT OF OPTICAL AND ELECTROCHEMICAL IMMUNODEVICE FOR  
THE DENGUE VIRUS DETECTION**

Milena Tereza Torres do Couto<sup>1,2</sup>; Alberto Galdino da Silva Júnior<sup>1,2</sup>; Karen Yasmim  
Pereira dos Santos Avelino<sup>2,3,4</sup>; Laura Helena Vega Gonzales Gil<sup>5</sup>; Marli Tenório  
Cordeiro<sup>5</sup>; Maria Danielly Lima de Oliveira<sup>1,2,4</sup>; César Augusto Souza de Andrade<sup>1,2,4</sup>.

<sup>1</sup> Programa de Pós-Graduação em Inovação Terapêutica, Universidade Federal de  
Pernambuco, 50670-901 Recife, PE, Brazil.

<sup>2</sup> Departamento de Bioquímica, Universidade Federal de Pernambuco, 50670-901  
Recife, PE, Brazil.

<sup>3</sup> Escola de Ciências da Saúde e da Vida, Universidade Católica de Pernambuco, 50050-  
410 Recife, PE, Brazil.

<sup>4</sup> OX-NANO Tecnologia, Porto Digital, 50030.140 Recife, PE, Brazil.

<sup>5</sup> Departamento de Virologia-Instituto Aggeu Magalhães-Fiocruz, 50670-420 Recife,  
PE, Brazil.

\*To whom correspondence should be addressed.

Cesar A.S. Andrade, Departamento de Bioquímica, UFPE, 50670-901, Recife, PE,

Brazil. Phone: +55-81-2126.8450

E-mail: csrandrade@gmail.com

**Figure S1.** The FTIR transmittance spectrum illustrates the modification achieved through the chemisorption of CdTe quantum dots and cysteine.

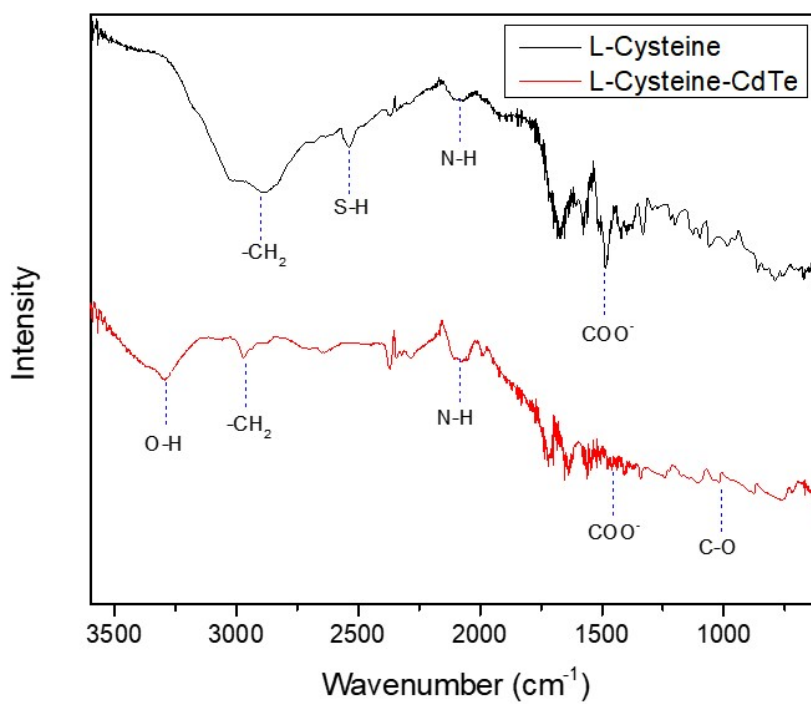

**Figure S2.** Graph illustrating the binding curves of each component in the biosensor platform: Cys (1); EDC:NHS (2); CdTe quantum dots (3); DENV-1 immunoglobulin (4); and DENV-1 in dilutions of 1:50 (5), 1:40 (6), 1:30 (7), 1:20 (8), and 1:10 (9).

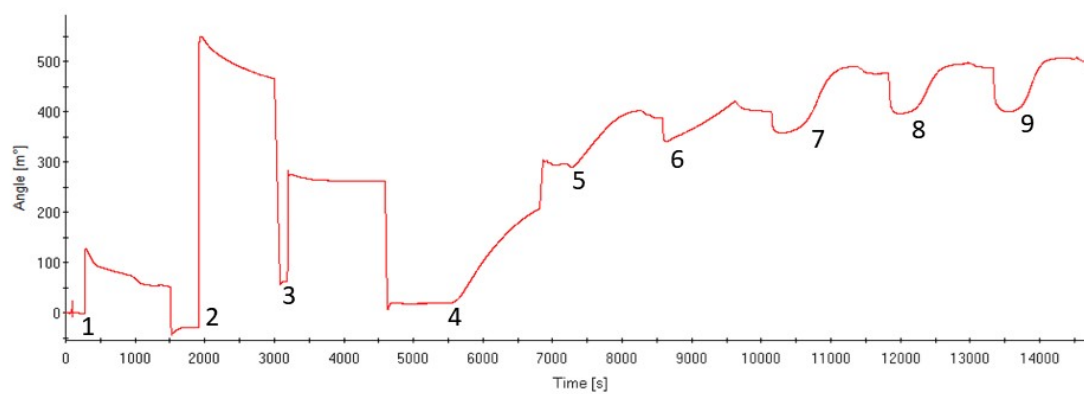

**Table S1.** Quantification of DENV isolates by plaque formation assay.

| <b>Sample</b>  | <b>Analyte dilution</b> | <b>Viral Title (PFU/mL)</b> |
|----------------|-------------------------|-----------------------------|
| DENV-1 Isolate | -                       | $2.0 \times 10^7$           |
| DENV-1         | 1:50                    | $0.4 \times 10^6$           |
| DENV-1         | 1:40                    | $0.5 \times 10^6$           |
| DENV-1         | 1:30                    | $0.66 \times 10^6$          |
| DENV-1         | 1:20                    | $1.0 \times 10^6$           |
| DENV-1         | 1:10                    | $2.0 \times 10^6$           |
| DENV-2 Isolate | -                       | $2.7 \times 10^6$           |
| DENV-2         | 1:50                    | $0.05 \times 10^6$          |
| DENV-2         | 1:40                    | $0.06 \times 10^6$          |
| DENV-2         | 1:30                    | $0.09 \times 10^6$          |
| DENV-2         | 1:20                    | $0.135 \times 10^6$         |
| DENV-2         | 1:10                    | $0.27 \times 10^6$          |

**Table S2.** Variation in diffraction angles over time for each sample deposited on the gold electrode surface.

| Sample               | Angle (m°) | Time (s) |
|----------------------|------------|----------|
| -                    | 0.00       | 115      |
| Cysteine             | 50.10      | 1500     |
| EDC/NHS              | 455.20     | 3076     |
| CdTe quantum dots    | 262.50     | 4626     |
| Anti-DENV-1 antibody | 204.40     | 6780     |
| DENV-1 (1:50)        | 401.30     | 8194     |
| DENV-1 (1:40)        | 418.00     | 9595     |
| DENV-1 (1:30)        | 489.20     | 11275    |
| DENV-1 (1:20)        | 496.90     | 12959    |
| DENV-1 (1:10)        | 505.90     | 14429    |

**Table S3.** Amperometric anodic shift for the construction steps of the biosensor after its exposure to DENV-1 and DENV-2.

| Electrode modification                   | Concentration (PFU/mL) | I <sub>PA</sub> before recognition (μA) | I <sub>PA</sub> after recognition (μA) | ΔI (%)         |
|------------------------------------------|------------------------|-----------------------------------------|----------------------------------------|----------------|
| Gold electrode                           | -                      | 86.32 ± 3.91                            | -                                      | -              |
| Cys                                      | -                      | 77.26 ± 3.00                            | -                                      | -              |
| Cys-CdTe                                 | -                      | 60.49 ± 2.60                            | -                                      | -              |
| Cys-CdTe-Antibody <sub>DENV-1</sub> -BSA | -                      | 45.35 ± 1.25                            | -                                      | -              |
| Biossensor-DENV-1                        | 0.4x10 <sup>6</sup>    | -                                       | 33.72 ± 1.46                           | 34.66 ± 5.84   |
| Biossensor-DENV-1                        | 0.5x10 <sup>6</sup>    | -                                       | 25.01 ± 0.87                           | 81.47 ± 6.32   |
| Biossensor-DENV-1                        | 0.66x10 <sup>6</sup>   | -                                       | 19.86 ± 0.94                           | 97.15 ± 14.75  |
| Biossensor-DENV-1                        | 1.0x10 <sup>6</sup>    | -                                       | 15.55 ± 0.72                           | 192.06 ± 13.54 |
| Biossensor-DENV-1                        | 2.0x10 <sup>6</sup>    | -                                       | 12.48 ± 0.43                           | 263.67 ± 12.54 |
| Cys-CdTe-Antibody <sub>DENV-2</sub> -BSA |                        | 53.88 ± 1.87                            |                                        |                |
| Biossensor-DENV-2                        | 0.05x10 <sup>6</sup>   | -                                       | 41.38 ± 1.37                           | 30.30 ± 2.32   |
| Biossensor-DENV-2                        | 0.06x10 <sup>6</sup>   | -                                       | 38.03 ± 1.09                           | 41.76 ± 2.06   |
| Biossensor-DENV-2                        | 0.09x10 <sup>6</sup>   | -                                       | 36.22 ± 1.51                           | 48.93 ± 2.21   |
| Biossensor-DENV-2                        | 0.135x10 <sup>6</sup>  | -                                       | 34.54 ± 1.46                           | 56.18 ± 3.61   |
| Biossensor-DENV-2                        | 0.27x10 <sup>6</sup>   | -                                       | 33.02 ± 1.35                           | 63.36 ± 3.68   |

**Table S4.** Analysis of the sensor against interfering molecules.

| <b>Interfering molecules</b> | <b>R<sub>CT</sub> (Ω)</b> | <b>CPE (μF)</b> | <b>R<sub>S</sub> (Ω)</b> | <b>Z<sub>w</sub></b> |
|------------------------------|---------------------------|-----------------|--------------------------|----------------------|
| Healthy serum 1              | 267 ± 12                  | 4.11 ± 0.56     | 438 ± 16                 | 481 ± 0.12           |
| Healthy serum 2              | 235 ± 07                  | 10.6 ± 0.49     | 578 ± 22                 | 254 ± 0.07           |
| Healthy serum 3              | 263 ± 09                  | 59.0 ± 0.62     | 361 ± 12                 | 613 ± 0.19           |
| Glucose                      | 240 ± 14                  | 3.90 ± 0.17     | 433 ± 14                 | 489 ± 0.08           |
| Citric acid                  | 250 ± 05                  | 33.0 ± 0.29     | 386 ± 09                 | 662 ± 0.11           |
| Cholesterol                  | 255 ± 11                  | 16.9 ± 0.41     | 527 ± 08                 | 272 ± 0.13           |
| NSE                          | 231 ± 10                  | 15.6 ± 0.46     | 332 ± 15                 | 573 ± 0.14           |
| Ascorbic acid                | 224 ± 13                  | 11.5 ± 0.32     | 411 ± 11                 | 510 ± 0.10           |
